# Supplementary material for: Two anthracene chromophore based metal–organic frameworks for gas adsorption and promising nitro aromatic sensing
Source: Royal Society of Chemistry journal article supplement (doi:10.1039/d0nj02753g), 2020-01-01
Supplement: d0nj02753g1.pdf [file d0nj02753g1.pdf]

## Supporting information

### **Two Anthracene Chromophores based Metal-Organic Frameworks for Gas Absorption and Promising Nitro Aromatic Sensing**

Xiao-Li Hu,<sup>ab</sup> Kang Wang,<sup>ab</sup> Xiao Li,<sup>\*ab</sup> Qing-Qing Pan,<sup>ab</sup> and Zhong-Min Su<sup>\*abc</sup>

<sup>a</sup>School of Chemistry and Environmental Engineering, Changchun University of Science and Technology, Changchun 130022, China. E-mail: huxiaoli1113@cust.edu.cn;

<sup>b</sup>Jilin Provincial Science and Technology Innovation Center of Optical Materials and Chemistry, Changchun. 130022, China;

<sup>c</sup>Joint Sino-Russian Laboratory of Optical Materials and Chemistry, Changchun 130022, China Email: zmsu@nenu.edu.cn.

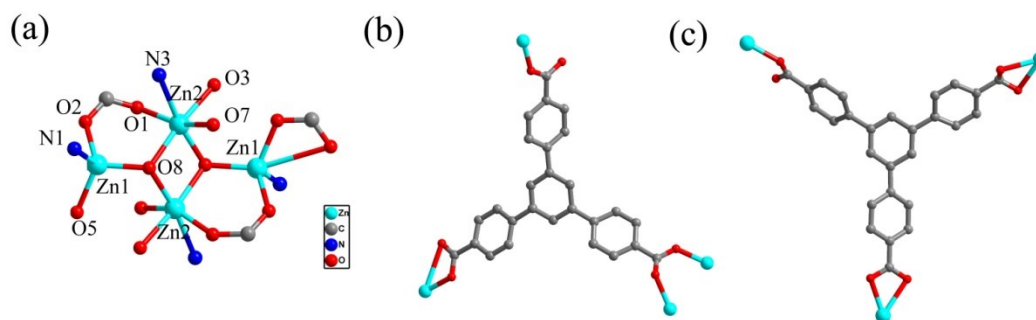

Fig. S1 (a) Tetranuclear Zn-cluster in **1**. (b) and (c) The coordination modes of btb in **1** and **2**.

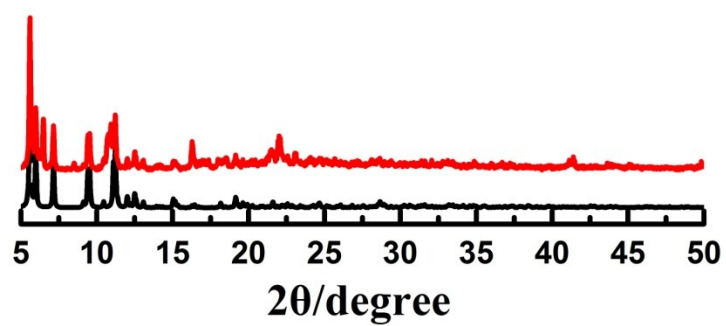

Fig. S2 PXRD patterns for **1**.

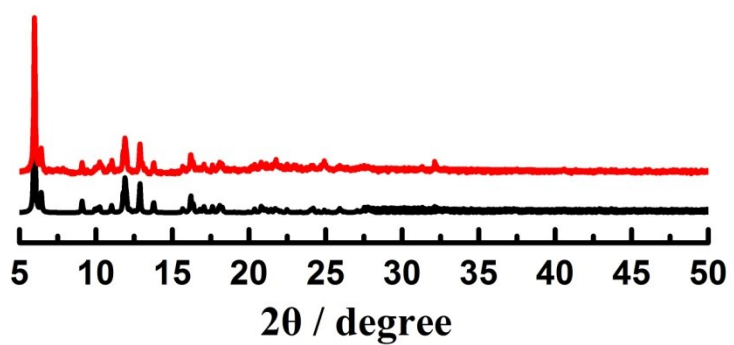

Fig. S3 PXRD patterns for **2**.

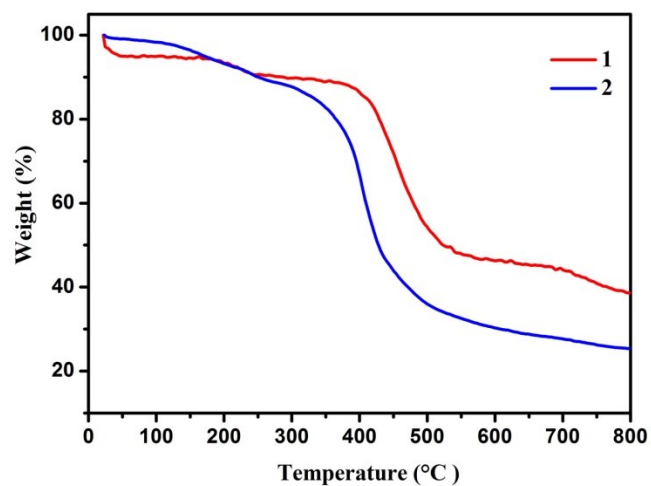

Fig. S4 TG curves for 1 and 2.

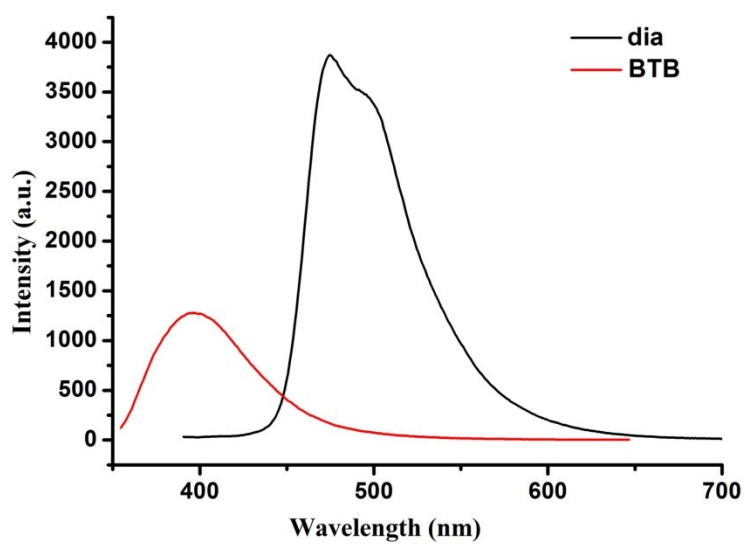

Fig. S5 Emission spectra of btb and dia ligand.

**Table S1** Crystallographic data and structure refinements for **1** and **2**.

|                                     | <b>1</b>                                                                      | <b>2</b>                                                                         |
|-------------------------------------|-------------------------------------------------------------------------------|----------------------------------------------------------------------------------|
| Formula                             | C <sub>47</sub> H <sub>30</sub> N <sub>4</sub> O <sub>8</sub> Zn <sub>2</sub> | C <sub>74</sub> H <sub>44</sub> Cd <sub>2</sub> N <sub>4</sub> NaO <sub>12</sub> |
| Mr                                  | 909.53                                                                        | 1428.92                                                                          |
| Crystal system                      | triclinic                                                                     | monoclinic                                                                       |
| space group                         | P-1                                                                           | C2/c                                                                             |
| a, Å                                | 9.797(4)                                                                      | 32.143(4)                                                                        |
| b, Å                                | 15.252(6)                                                                     | 10.3824(10)                                                                      |
| c, Å                                | 16.948(7)                                                                     | 32.772(4)                                                                        |
| α, deg                              | 75.387(7)                                                                     | 90                                                                               |
| β, deg                              | 73.275(7)                                                                     | 115.790(4)                                                                       |
| γ, deg                              | 85.170(7)                                                                     | 90                                                                               |
| V, Å <sup>3</sup>                   | 2346.7(16)                                                                    | 9847.4(18)                                                                       |
| Z                                   | 2                                                                             | 4                                                                                |
| D <sub>x</sub> , g cm <sup>-3</sup> | 1.287                                                                         | 0.964                                                                            |
| μ, mm <sup>-1</sup>                 | 1.075                                                                         | 0.480                                                                            |
| Unique. reflns/R <sub>int</sub>     | 0.0577                                                                        | 0.0545                                                                           |
| R <sub>1</sub> [I > 2σ(I)]          | 0.0765                                                                        | 0.0721                                                                           |
| wR <sub>2</sub> (All data)          | 0.2153                                                                        | 0.2190                                                                           |
| GOF                                 | 0.871                                                                         | 0.967                                                                            |

**Table S2** Selected bond lengths [Å] and Selected angles [°] for **1**.

|                |            |                |            |
|----------------|------------|----------------|------------|
| Zn1-N1         | 2.021(6)   | O3#3-Zn2-O1#2  | 153.2(3)   |
| Zn1-O2         | 1.945(4)   | O3#3-Zn2-O9#2  | 92.47(16)  |
| Zn1-O5#1       | 1.951(4)   | O3#3-Zn2-N3    | 78.3(3)    |
| Zn1-O9         | 1.934(4)   | O9#2-Zn2-Zn2#2 | 84.6(3)    |
| Zn2-O1#2       | 1.984(6)   | O9-Zn2-O7      | 41.34(12)  |
| Zn2-O3#3       | 1.969(4)   | O9#2-Zn2-N3    | 88.19(18)  |
| Zn2-O7         | 2.156(5)   | N3-Zn2-Zn2#2   | 144.8(3)   |
| Zn2-O9#2       | 2.109(4)   | O2-Zn1-O5#1    | 120.92(18) |
| Zn2-O9         | 2.074(5)   | O9-Zn1-N1      | 110.48(19) |
| Zn2-N3         | 2.327(8)   | O9-Zn1-O5#1    | 109.68(18) |
| O2-Zn1-N1      | 98.6(2)    | O1#2-Zn2-O7    | 86.4(2)    |
| O5#1-Zn1-N1    | 107.4(2)   | O1#2-Zn2-O9    | 109.5(2)   |
| O9-Zn1-O2      | 108.96(17) | O3#3-Zn2-Zn2#2 | 96.18(15)  |
| O1#2-Zn2-Zn2#2 | 106.59(19) | O3#3-Zn2-O7    | 89.50(19)  |
| O1#2-Zn2-O9#2  | 95.37(19)  | O3#3-Zn2-O9    | 96.8(2)    |
| O1#2-Zn2-N3    | 74.9(3)    | O7-Zn2-Zn2#2   | 130.37(15) |
| O9-Zn2-N3      | 83.53(17)  | O9#2-Zn2-O7    | 42.19(10)  |
|                |            | O9-Zn2-O9#2    | 171.66(19) |

Symmetry transformations used to generate equivalent atoms:  $^1$ -1+X,+Y,1+Z;  $^2$ -X,-Y,-1-Z;  $^3$ 1-X,-1-Y,-1-Z.

**Table S3** Selected bond lengths [Å] and Selected angles [°] for **2**.

|               |            |               |            |
|---------------|------------|---------------|------------|
| Cd1-O1#1      | 2.487(4)   | O3-Cd1-O6#2   | 93.8(3)    |
| Cd1-O2#       | 2.277(4)   | O3-Cd1-O8#2   | 147.9(3)   |
| Cd1-N1        | 2.250(4)   | O3-Cd1-N1     | 107.00(18) |
| Cd1-O3        | 2.167(5)   | O3-Cd1-O6#2   | 93.8(3)    |
| Cd1-O5#2      | 2.400(10)  | O3-Cd1-O8#2   | 147.9(3)   |
| Cd1-O6#2      | 2.358(8)   | O3-Cd1-N1     | 107.00(18) |
| Cd1-O7#2      | 2.507(8)   | O3-Cd1-O6#2   | 93.8(3)    |
| Cd1-O8#2      | 2.384(11)  | O3-Cd1-O8#2   | 147.9(3)   |
| O1#1-Cd1-O7#2 | 139.4(3)   | O2#1-Cd1-O1#1 | 54.02(13)  |
| O2#1 Cd1-O5#2 | 108.6(3)   | O2#1-Cd1-O6#2 | 113.4(3)   |
| O2#1 Cd1-O7#2 | 86.3(3)    | O2#1 Cd1 O8#2 | 88.8(3)    |
| N1-Cd1-1#1    | 81.38(15)  | N1-Cd1-O2#1   | 131.14(17) |
| N1-Cd1-O5#2   | 79.4(3)    | N1-Cd1-O6#2   | 107.9(3)   |
| N1-Cd1-O7#2   | 129.6(3)   | N1-Cd1-O8#2   | 95.2(3)    |
| O3-Cd1-O1#1   | 95.47(19)  | O3-Cd1-O2#1   | 95.47(19)  |
| O3-Cd1-N1     | 107.00(18) | O3-Cd1-O5#2   | 94.9(2)    |
|               |            | O3-Cd1-O7#2   | 105.3(3)   |

Symmetry transformations used to generate equivalent atoms:  $^1$ +X,2-Y,1/2+Z;  $^2$ -1/2+X,-1/2+Y,+Z.

**Table S4** The comparison of  $K_{sv}$  for **1**, **2** and other reported MOFs.

| MOF                                                                                                                                   | $K_{sv}$                               | Ref          |
|---------------------------------------------------------------------------------------------------------------------------------------|----------------------------------------|--------------|
| 1                                                                                                                                     | $2.84 \times 10^5 \text{ M}^{-1}$      | In this work |
| 2                                                                                                                                     | $2.50 \times 10^5 \text{ M}^{-1}$      | In this work |
| [Tb(L)(OH)]·x(solv)                                                                                                                   | $7.73 \times 10^{-2} \text{ ppm}^{-1}$ | 1            |
| Zr-NDC/Tz and Zr-NDC/CN)                                                                                                              | $1.8 \times 10^4 \text{ M}^{-1}$       | 2            |
| [Cd(NDC) <sub>0.5</sub> (PCA)].xG                                                                                                     | $3.5 \times 10^4 \text{ M}^{-1}$       | 3            |
| [(CH <sub>3</sub> ) <sub>2</sub> NH <sub>2</sub> ] <sub>3</sub> [Zn <sub>4</sub> Na(BP<br>TC) <sub>3</sub> ].4CH <sub>3</sub> OH·2DMF | $3.2 \times 10^4 \text{ M}^{-1}$       | 4            |
| [Zn(NDC)(H <sub>2</sub> O)] <sub>n</sub>                                                                                              | $6 \times 10^4 \text{ M}^{-1}$         | 5            |
| [Cd(NDC)(H <sub>2</sub> O)] <sub>n</sub>                                                                                              | $2.385 \times 10^4 \text{ M}^{-1}$     | 5            |
| {[Tb(L) <sub>1.5</sub> (H <sub>2</sub> O)]·3H <sub>2</sub> O} <sub>n</sub>                                                            | $7.47 \times 10^4 \text{ M}^{-1}$      | 6            |

### Reference

1. J. Qin, B. Ma, X.-F. Liu, H.-L. Lu, X.-Y. Dong, S.-Q. Zang and H. Hou, *J. Mater. Chem. A.*, 2015, **3**, 12690.
2. M. Gutiérrez, R. Navarro, F. Sánchez and A. Douhal, *Phys. Chem. Chem. Phys.*, 2017, **19**, 16337.
3. S. S. Nagarkar, B. Joarder, A. K. Chaudhari, S. Mukherjee and S. K. Ghosh, *Angew. Chem. Int. Ed.*, 2013, **52**, 2881.
4. E.-L. Zhou, P. Huang, C. Qin, K.-Z. Shao and Z.-M. Su, *J. Mater. Chem. A.*, 2015, **3**, 7224.
5. P. Ghosh, S. K. Saha, A. Roychowdhury and P. Banerjee, *Eur. J. Inorg. Chem.*, 2015, 2851.
6. L.-H. Cao, F. Shi, W.-M. Zhang, S.-Q. Zang and T. C. W. Mak, *Chem. Eur. J.*, 2015, **21**, 15705.
